# Supplementary material for: Guanylurea(1+) hydrogen phosphite: a novel promising phase-matchable material for second harmonic generation
Source: Royal Society of Chemistry journal article supplement (doi:10.1039/b924973g), 2010-01-01
Supplement: b924973g.pdf [file b924973g.pdf]

## Electronic Supplementary Information (ESI) service

*Guanylurea(1+) hydrogen phosphite: a novel promising phase-matchable material for second harmonic generation*

**Michaela Fridrichová<sup>1</sup>, Ivan Němec<sup>1</sup>, Ivana Císařová<sup>1</sup>, Petr Němec<sup>2</sup>**

<sup>1</sup>Charles University in Prague, Faculty of Science, Department of Inorganic Chemistry, Hlavova 2030, 128 40 Prague 2, Czech Republic

<sup>2</sup>Charles University in Prague, Faculty of Mathematics and Physics, Department of Chemical Physics and Optics, Ke Karlovu 3, 121 16 Prague 2, Czech Republic

**A novel and promising material, guanylurea(1+) hydrogen phosphite which belongs to the group of inorganic salts of polarisable organic molecules was prepared. Its real potential for optical applications is based on the simplicity of synthesis, good ability to crystallize, transparency, thermal stability and efficiency of the second harmonic generation comparable to urea.**

### **Synthesis**

**GUHP** was prepared in high yield (3.3g, 87%) by acid hydrolysis of saturated aqueous solution containing 2 g of cyanoguanidine (Fluka, 98%) with 12 ml of the solution (2 mol.dm<sup>-3</sup>) of the phosphorous acid (Fluka, 97.5%). After few days of spontaneous crystallization in an open beaker at the laboratory temperature, small colourless crystals were obtained and purified by recrystallization from water. The substance is transparent, not hygroscopic, and stable on air up to its melting point (mp 179°C (from water)).

### **X-ray structure determination**

Collection of X-ray structural data was performed on a Nonius Kappa CCD diffractometer (MoK<sub>α</sub> radiation, graphite monochromator). The phase problem was solved by direct methods (SIR-92<sup>1</sup>) and the non-hydrogen atoms were refined anisotropically, using the full-matrix least-squares procedure (SHELXL-97<sup>2</sup>). The positions of the hydrogen atoms were localised on difference Fourier maps and refined isotropically. The basic crystallographic data, measurement and refinement details are summarised in Table 1. The crystallographic data were deposited with the Cambridge Crystallographic Data Centre as supplementary publication CCDC 752254. A copy of the data can be obtained free of charge on application to CCDC, 12 Union Road, Cambridge CG21, EZ, UK (fax: +44 1223 336 033; e-mail:

[deposit@ccdc.cam.ac.uk](mailto:deposit@ccdc.cam.ac.uk)). Atom numbering and packing scheme are depicted in Fig. 1 and Fig. 2, respectively.

**Table 1:** Basic crystallographic data and structure refinement details of **GUHP**.

| Identification code                                                   | GUHP                                                                                                    |
|-----------------------------------------------------------------------|---------------------------------------------------------------------------------------------------------|
| Empirical formula                                                     | C <sub>2</sub> H <sub>9</sub> N <sub>4</sub> O <sub>4</sub> P                                           |
| Formula weight                                                        | 184.10                                                                                                  |
| Temperature (K)                                                       | 293                                                                                                     |
| <i>a</i> (Å)                                                          | 6.6990(3)                                                                                               |
| <i>b</i> (Å)                                                          | 6.8420(2)                                                                                               |
| <i>c</i> (Å)                                                          | 16.354(1)                                                                                               |
| $\beta$ (°)                                                           | 96.514(3)                                                                                               |
| Volume (Å <sup>3</sup> )                                              | 744.74(6)                                                                                               |
| <i>Z</i>                                                              | 4                                                                                                       |
| Calculated density (Mg/m <sup>3</sup> )                               | 1.642                                                                                                   |
| Crystal system                                                        | monoclinic                                                                                              |
| Space group                                                           | <i>Cc</i>                                                                                               |
| absorption coefficient (mm <sup>-1</sup> )                            | 0.348                                                                                                   |
| <i>F</i> (000)                                                        | 384                                                                                                     |
| crystal size (mm)                                                     | 0.15 x 0.20 x 0.47                                                                                      |
| Diffractometer and radiation                                          | Nonius Kappa CCD, Mo $\lambda$ = 0.71073 Å                                                              |
| Scan technique                                                        | $\omega$ and $\psi$ scans to fill Ewald sphere                                                          |
| Completeness to $\theta$                                              | 27.53, 99.5%                                                                                            |
| range of <i>h, k, l</i>                                               | -8 → 8, -8 → 8, -21 → 21                                                                                |
| $\theta$ range for data collection (°)                                | 4.27 – 27.53                                                                                            |
| Reflection collected/unique ( <i>R</i> <sub>int</sub> )               | 4256/ 1637 (0.026)                                                                                      |
| No. of reflections observed                                           | 1562                                                                                                    |
| Absorption correction                                                 | none                                                                                                    |
| Function minimised                                                    | $\Sigma w(F_o^2 - F_c^2)^2$                                                                             |
| Weighting scheme                                                      | $w = [\sigma^2 (F_o^2) + (aP)^2 + bP]^{-1}$<br>$P = (F_o^2 + 2F_c^2)/3$<br>$a = 0.0318$<br>$b = 0.2284$ |
| Parameters refined                                                    | 138                                                                                                     |
| <i>R</i> , <i>wR</i> [ <i>I</i> > 2 $\sigma$ ( <i>I</i> )]            | 0.0276, 0.0660                                                                                          |
| <i>R</i> , <i>wR</i> (all data)                                       | 0.0301, 0.0679                                                                                          |
| Value of <i>S</i>                                                     | 1.090                                                                                                   |
| Maximum and minimum heights in final $\Delta\rho$ (eÅ <sup>-3</sup> ) | 0.172 and -0.182                                                                                        |
| Source of atomic scattering factors                                   | SHELXL-97                                                                                               |
| Programmes used                                                       | SHELXL-97, PLATON, SIR92                                                                                |



**Fig. 1:** Atom numbering of **GUHP**.



**Fig. 2:** Packing scheme of **GUHP** (view in  $[1\ 0\ 0]$  direction). Dashed lines indicate hydrogen bonds. Carbon atoms are shown in black, nitrogen atoms in blue, phosphorus atoms in green, oxygen atoms in red and hydrogen atoms are colourless.

### ***Vibrational spectra***

IR spectra were recorded using nujol and fluorolube mull (AgCl windows - MID, PE windows - FAR) techniques on a Nicolet Magna 760 FTIR spectrometer with 2 cm<sup>-1</sup> resolution and Happ-Genzel apodization in the 50 - 4000 cm<sup>-1</sup> region. The Raman spectra of polycrystalline samples were recorded on a Nicolet Magna 760 FTIR spectrometer equipped with the Nicolet Nexus FT Raman module (2 cm<sup>-1</sup> resolution, Happ-Genzel apodization, 1064 nm Nd:YVO<sub>4</sub> laser excitation, 200 mW power at the sample) in the 100–3700 cm<sup>-1</sup> region. Recorded vibrational spectra are presented in Figure 3. Observed peaks are listed below:

IR spectrum:  $\nu_{\max}/\text{cm}^{-1}$  77w, 147m, 183w, 288w, 430s, 459w, 501w, 540m, 566m, 591m, 690w, 716w, 733w, 763w, 830w, 904s, 937 m, 1003s, 1029s, 1039sh, 1051m, 1101w, 1149m, 1216m, 1367m, 1456m, 1557m, 1600m, 1634m, 1692m, 1738m, 1750sh, 2310mb, 2418m, 2795mb, 3181mb, 3341mb, 3406mb.

Raman spectrum:  $\nu_{\max}/\text{cm}^{-1}$  130s, 141s, 174m, 289w, 355w, 430m, 440s, 456s, 543w, 567m, 633w, 715m, 763w, 905m, 938m, 1004s, 1029s, 1039s, 1052s, 1095w, 1140w, 1217w, 1382w, 1463w, 1546w, 1605w, 1637w, 1688w, 1738w, 1745w, 2418s, 2467w, 3189wb, 3236wb, 3315wb.



**Fig 3:** IR (compilation of nujol and fluorolube mulls) and Raman spectra of **GUHP**.

## **References**

- 1 A. Altomare, M.C. Burla, M. Camalli, G. Cascarano, C. Giacovazzo, A. Guagliardi, G. Polidori, SIR97 – *J. Appl. Crystallogr.*, 1994, **27**, 435.
- 2 G.M. Sheldrick, SHELXL 97, Program for Refinement from Diffraction Data, University of Göttingen Germany, Göttingen, 1997.
